# Supplementary material for: Smectic polymer vesicles
Source: Royal Society of Chemistry journal article supplement (doi:10.1039/b907485f), 2009-01-01
Supplement: b907485f.pdf [file b907485f.pdf]

# Smectic Polymer Vesicles

Lin Jia,<sup>†,††</sup> Amin Cao,<sup>‡</sup> Daniel Lévy,<sup>†</sup> Bing Xu,<sup>†</sup> Pierre-Antoine Albouy,<sup>§</sup> Xiangjun Xing<sup>#</sup>,

Mark J. Bowick<sup>#</sup> and Min-Hui Li<sup>\*†</sup>

<sup>†</sup>Institut Curie, CNRS, Université Pierre et Marie Curie, Laboratoire Physico-Chimie Curie, UMR168, 26 rue d'Ulm, 75248 Paris CEDEX 05, France, <sup>††</sup>Fondation Pierre-Gilles de Gennes pour la Recherche, 29 rue d'Ulm, 75005 Paris CEDEX 05, France, <sup>‡</sup>Laboratory for Polymer Materials, Shanghai Institute of Organic Chemistry, Chinese Academy of Sciences, 354 Fenglin Road, Shanghai 200032, China, <sup>§</sup> Université Paris-Sud, CNRS, Laboratoire de Physique des Solides, UMR8502, 91405 Orsay CEDEX, France, and <sup>#</sup>Physics Department, Syracuse University, Syracuse NY 13244-1130, USA .

\* Corresponding author:

E-mail: [min-hui.li@curie.fr](mailto:min-hui.li@curie.fr), Tel.: 33 1 56246763, Fax: 33 1 40510636

## Supplementary Information

### SYNTHETICAL PROTOCOL

The liquid-crystalline (LC) homopolymer PACHol was synthesized by ATRP according to the following protocole. A Schlenk flask with a magnetic stir bar was charged with Cu<sup>I</sup>Br (14.34 mg, 0.1 mmol), ethyl 2-bromo-2-methylpropionate (19.51 mg, 0.1 mmol), 4,4'-di(*n*-nonyl)-2,2'-bipyridine (81.76 mg, 0.2 mmol) and monomer AChol (528.66 mg, 1 mmol). The flask was degassed by four vacuum-argon cycles. Toluene (1 mL), degassed by

argon bubbling for 30 min, was then introduced into the flask using a syringe purge with argon. The flask was then immersed in an oil bath thermostated at 80 °C. After 24 h of reaction, the mixture was cooled to room temperature. The resulting polymer solution was poured into a large volume of diethyl ether. The precipitated diblock copolymer was purified 4 times by dissolution in a small amount of dichloromethane and precipitation into a large volume of methanol, and once by dissolution in acetone and precipitation into methanol. The purified polymer was dried under vacuum at room temperature for 3 days. Yield: 0.4336 g (79%).

The side-chain LC diblock copolymers PEG-*b*-PACHol were also synthesized by ATRP. For the synthesis of Copo1, a Schlenk flask with a magnetic stir bar was charged with PEG-Br macroinitiator (0.213g, 0.1 mmol), Cu<sup>I</sup>Br (28.6 mg, 0.2 mmol), and monomer AChol (0.4 g, 0.76mmol). The flask was degassed for 30 min. Then xylene (0.5 mL) and PMDETA (34.6 mg, 0.2 mmol) were added and the flask was further degassed by three freeze-pump-thaw cycles, and then immersed in an oil bath thermostated at 80°C. After 24 h of reaction, the mixture was immersed in liquid nitrogen for 10 min and the flask was warmed slowly in ethanol to room temperature. The polymerization mixture was first passed through a short column of aluminum oxide, using CH<sub>2</sub>Cl<sub>2</sub> as eluent to remove copper salts. The resulting polymer solution was poured into a large volume of methanol. The removal of unreacted monomer from the polymer was confirmed by the disappearance of the peaks associated with the alkene protons at 5.8 and 6.1 ppm in the <sup>1</sup>H NMR spectra of the monomer. The purified polymer was dried under vacuum at room temperature for 2 days. Yield: 0.53g (86%). For the synthesis of Copo2, similar procedure was used except the weight of monomer AChol( 0.6 g, 1.14 mmol) and the polymerization time (36 hours).

**Table S1 Molecular weights and molecular weight distributions of homopolymers and diblock copolymers PEG<sub>45</sub>-*b*-PACHol**

| Samples               | $M_{n,NMR}$<br>(g.mol <sup>-1</sup> ) <sup>a</sup> | $n_{ACHol}$ <sup>a</sup> | $M_{n,SEC}$<br>(g.mol <sup>-1</sup> ) <sup>b</sup> | $M_w/M_n$ <sup>b</sup> |
|-----------------------|----------------------------------------------------|--------------------------|----------------------------------------------------|------------------------|
| PEG <sub>45</sub> -Br | -                                                  | -                        | 2300                                               | 1.04                   |
| Homopolymer PACHol    | 5230                                               | 10                       | -                                                  | 1.11                   |
| Copo1 (28/72)         | 7100                                               | 10                       | 6000                                               | 1.13                   |
| Copo2 (20/80)         | 10200                                              | 16                       | 6500                                               | 1.14                   |

Notes: <sup>a</sup> Degree of polymerization  $n_{ACHol}$  and molecular weights calculated by <sup>1</sup>H NMR.

<sup>b</sup> Molecular weights and their distributions determined by SEC calibrated with polystyrene standards for homopolymer PACHol and by SEC calibrated with poly(ethylene glycol) standards for PEG<sub>45</sub>-Br and copolymers.

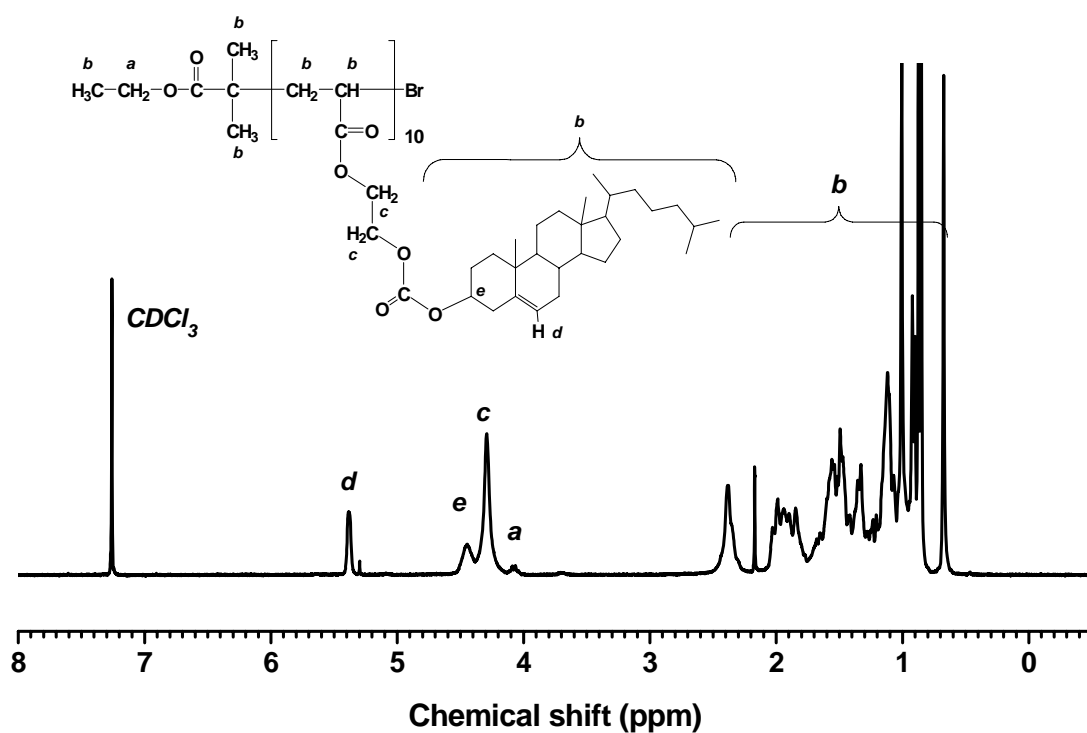

Figure S1. 300 MHz <sup>1</sup>H NMR spectrum of the LC homopolymer PACHol

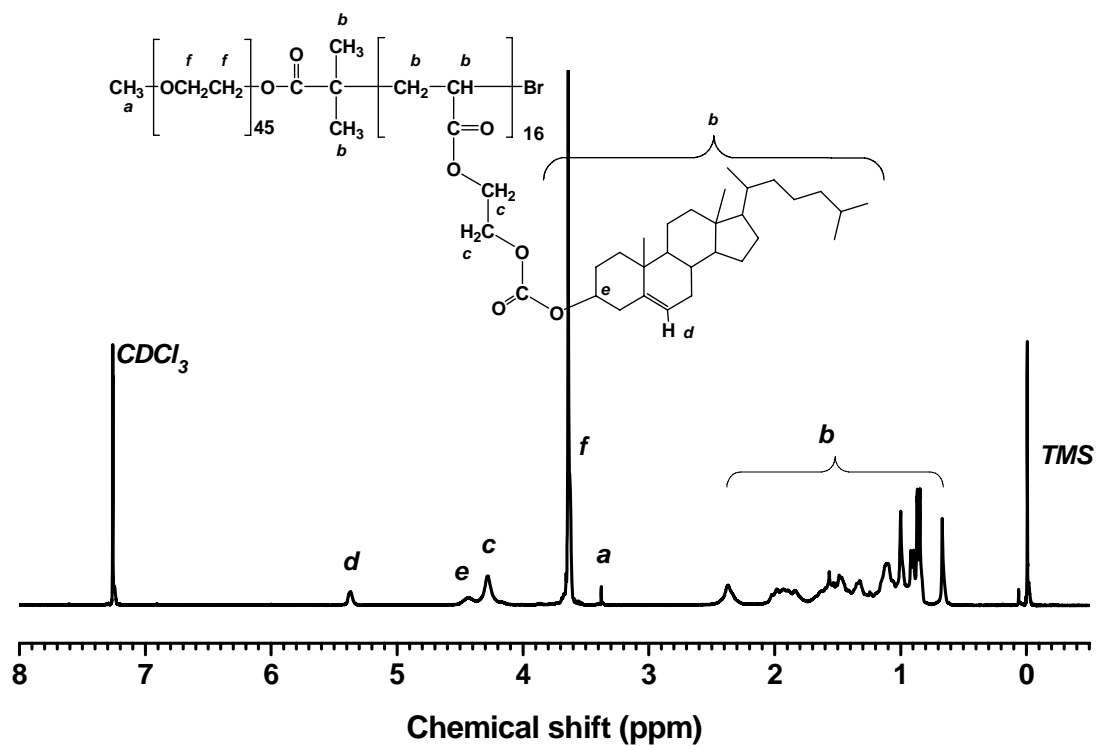

Figure S2. 300 MHz <sup>1</sup>H NMR spectrum of the LC diblock copolymer PEG-*b*-PACHol (20/80)

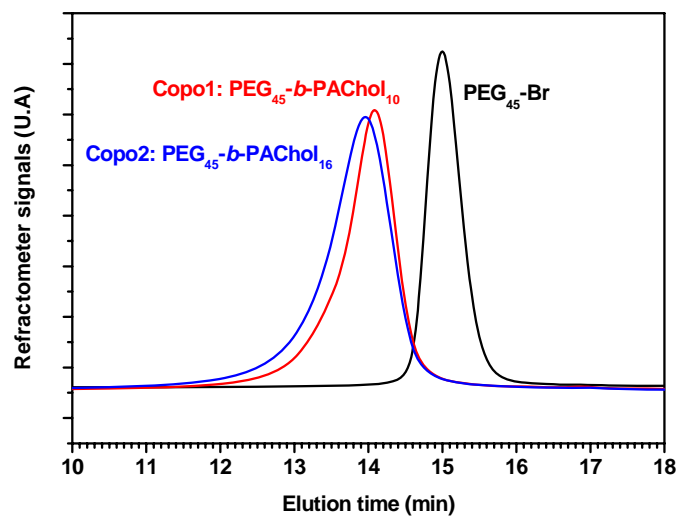

Figure S3. SEC curves of the LC block copolymers and macro-initiator PEG<sub>45</sub>-Br.

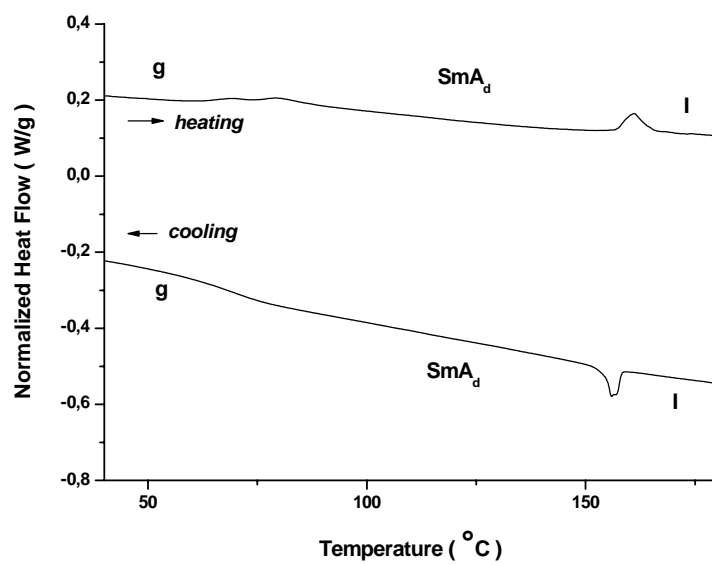

Figure S4. DSC curves of the LC homopolymer PACHol on heating and cooling at 10°C.min<sup>-1</sup>

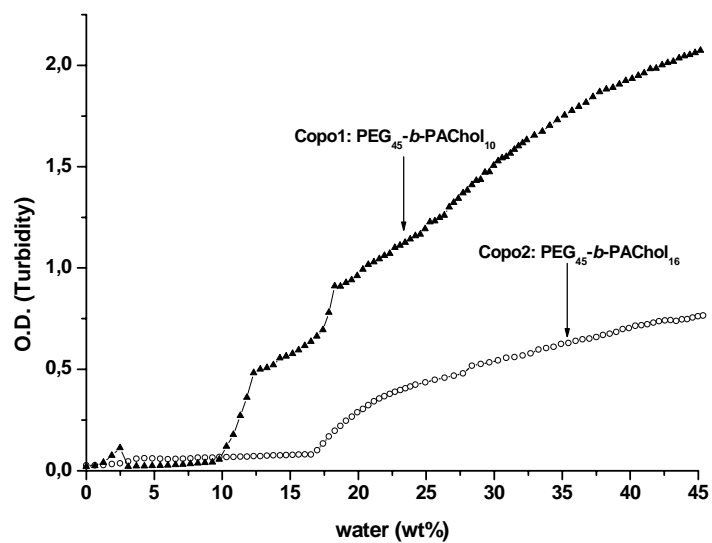

Figure S5. Turbidity (optical density) curves of Copo1 (o) and Copo2 (▲) solutions in dioxane as a function of the amount of water added (starting concentration was 1.0wt% in dioxane).

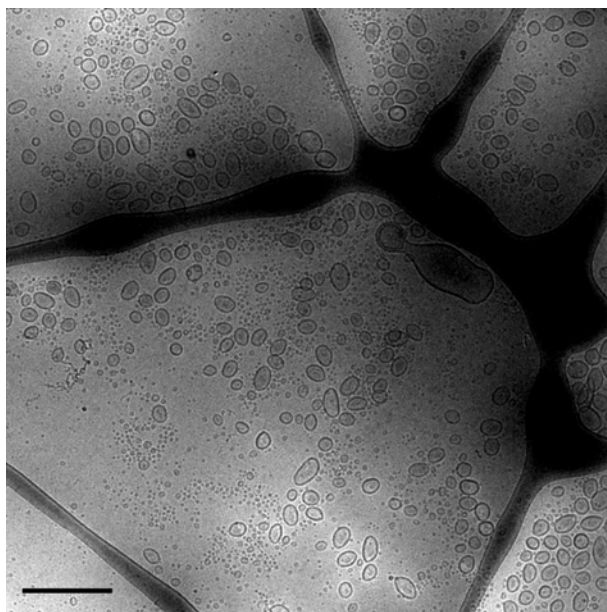

Figure S6. Cryo-TEM image of Copol at 3000 magnification. Scale bar = 1  $\mu\text{m}$ .

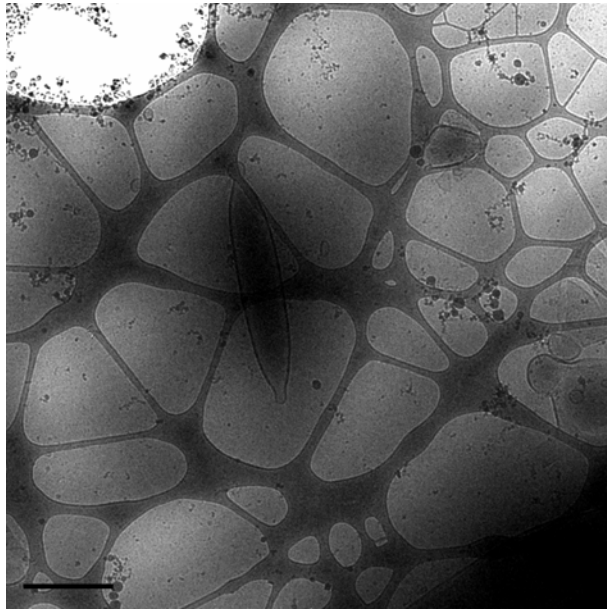

Figure S7. Cryo-TEM image of Copo2 at 3000 magnification. Scale bar = 1  $\mu\text{m}$ .
